# Supplementary material
Source: publisher site journal article supplement (https://www.dovepress.com/article/211904)

**Supplementary Figure 1. Effect of MO on autophagic vacuoles in H1299 cells by TEM.**

H1299 cells were treated with MO (40  $\mu$ M) for 12 h, and autophagic morphology was observed by TEM. Magnification image (x 80000) in the white square (bottom panel).

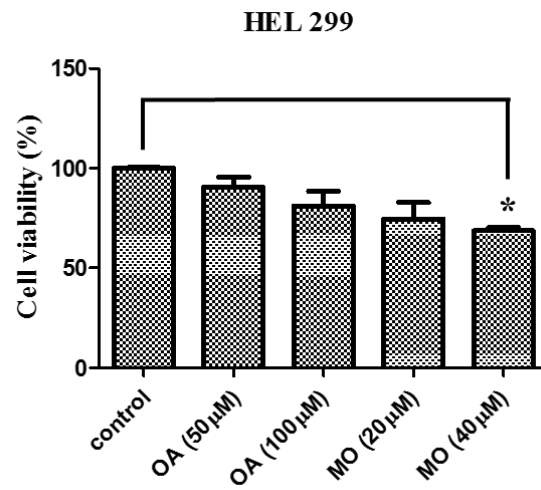

**Supplementary Figure 2. Effect of OA and MO on cytotoxicity in normal lung fibroblast HEL 299 cells.** HEL299 cells were treated with OA (50, 100  $\mu\text{M}$ ) or MO (20, 40  $\mu\text{M}$ ) for 24 h and the viability was evaluated by MTT assay.

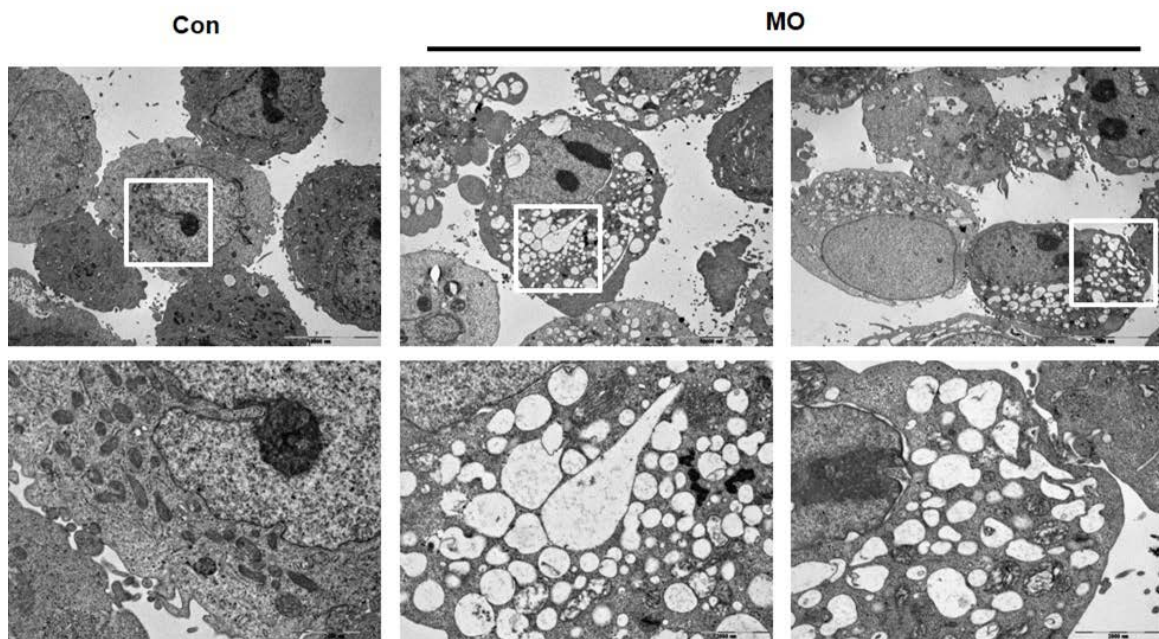

Supplement: Supplementary file 1 [file get_supplementary_file.php]
